# Supplementary material for: Otolith geochemistry reflects life histories of Pacific bluefin tuna
Source: PubMed Central journal article supplement (PMC9565424; doi:10.1371/journal.pone.0275899), 2022-10-14

Supplemental materials – Mohan et al.

## **Otolith geochemistry reflects life histories of Pacific bluefin tuna**

John A. Mohan<sup>1,2</sup>, Heidi Dewar<sup>3</sup>, Owyn E. Snodgrass<sup>3</sup>, Nathan R. Miller<sup>4</sup>, Yosuke Tanaka<sup>5</sup>, Seiji Ohshimo<sup>4,5</sup>, Jay R. Rooker<sup>1</sup>, Malcom Francis<sup>6</sup>, R. J. David Wells<sup>1</sup>

<sup>1</sup> Texas A&M University at Galveston, Department of Marine Biology, 1001 Texas Clipper Rd., Galveston, TX 77553, USA

<sup>2</sup> University of New England, School of Marine and Environmental Programs, 11 Hills Beach Rd, 04005

<sup>3</sup> Southwest Fisheries Science Center, National Marine Fisheries Service, 8901 La Jolla Shores Dr., La Jolla, CA 92037, USA

<sup>4</sup> The University of Texas at Austin, Jackson School of Geosciences, 2275 Speedway Stop C9000, Austin, TX 78712, USA

<sup>5</sup> Highly Migratory Resources Division, Fisheries Stock Assessment Center, Fisheries Resources Institute, Fisheries Research and Education Agency, 5-7-1, Orido, Shimizu, Shizuoka, 424-8633, Japan

<sup>6</sup> Pelagic Fish Resources Division, Fisheries Stock Assessment Center, Fisheries Resources Institute, Fisheries Research and Education Agency, 1551-8 Taira-machi, Nagasaki, 851-2213, Japan

<sup>7</sup> National Institute of Water and Atmospheric Research (NIWA), Private Bag 14901, Wellington 6021, New Zealand

Keywords: *Thunnus orientalis*, migration, biomineralization, trace elements, otolith chemistry

Supplemental materials – Mohan et al.

**Supplemental Figure 1 (below).** Elemental profiles of individual PBT otoliths collected from the Eastern Pacific (EPO), Western Pacific (WPO) and South Pacific (SPO); different colored lines represent individual fish from each region. See Table 1 for details on collection. Asterisk (\*) indicates visible crystal bond on surface of NZ02 that was removed from Figure 1.

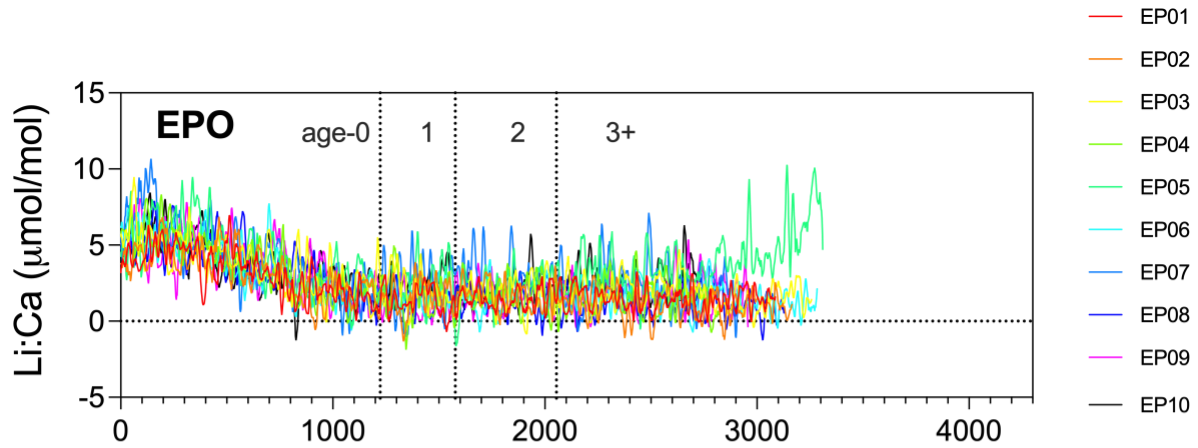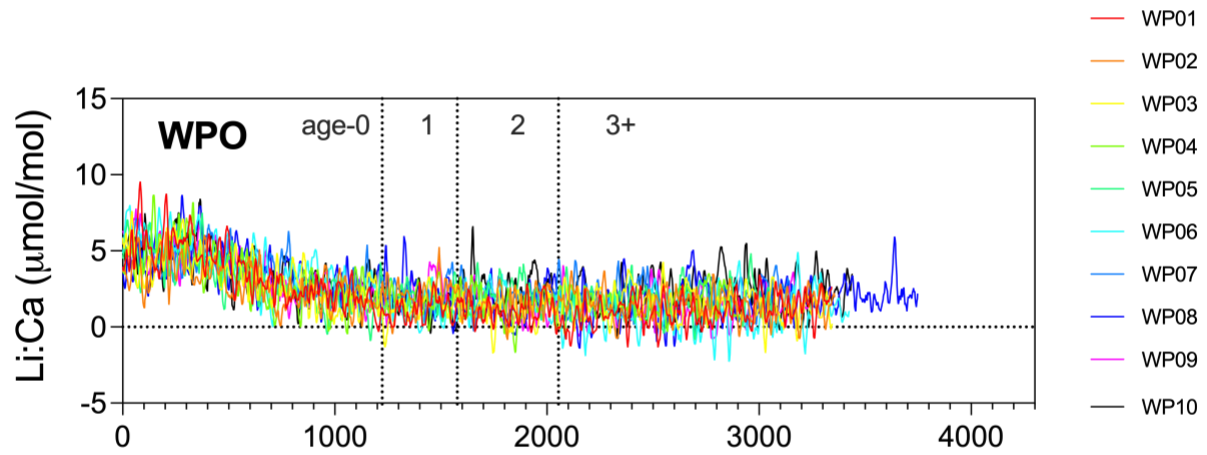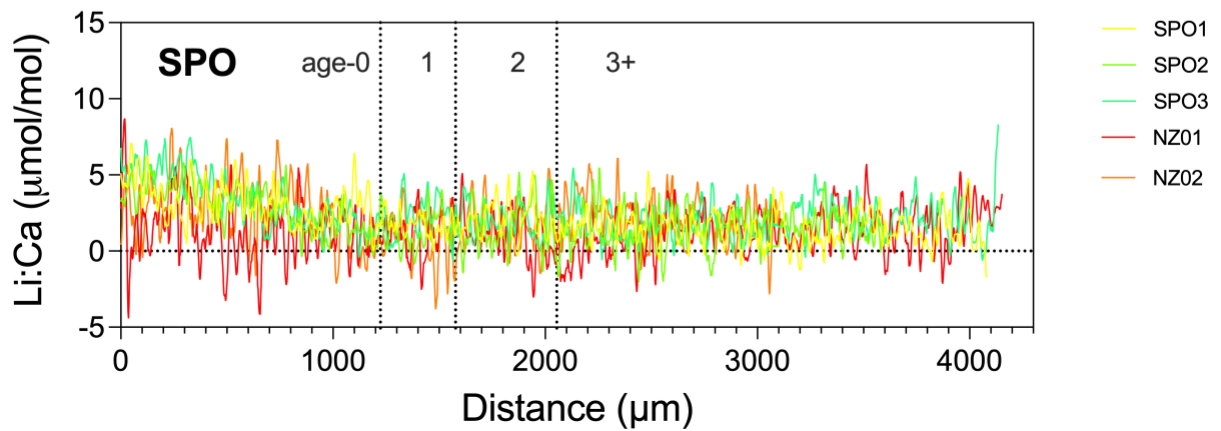

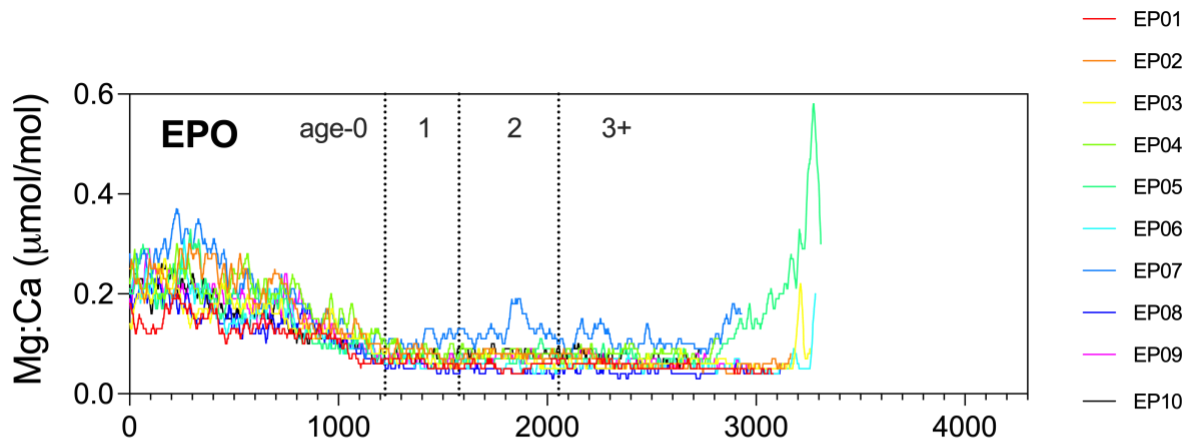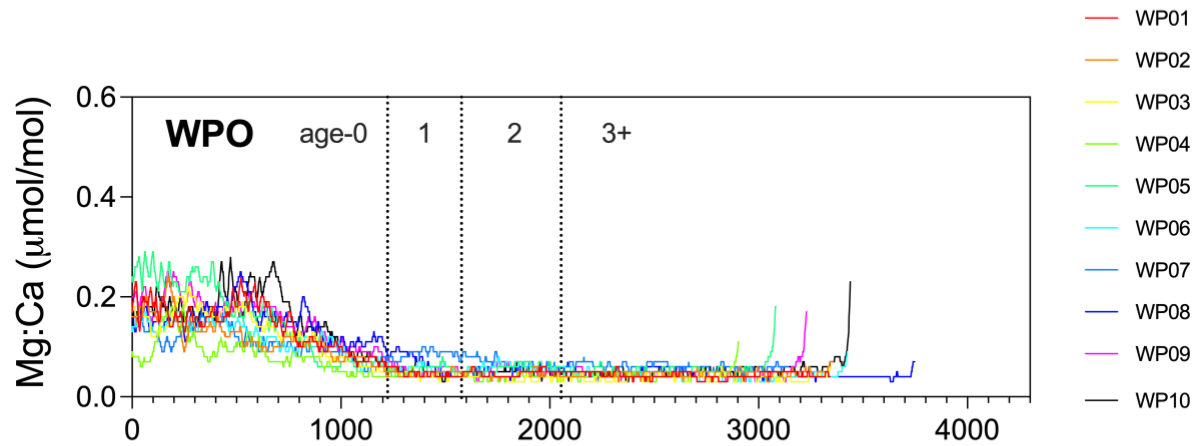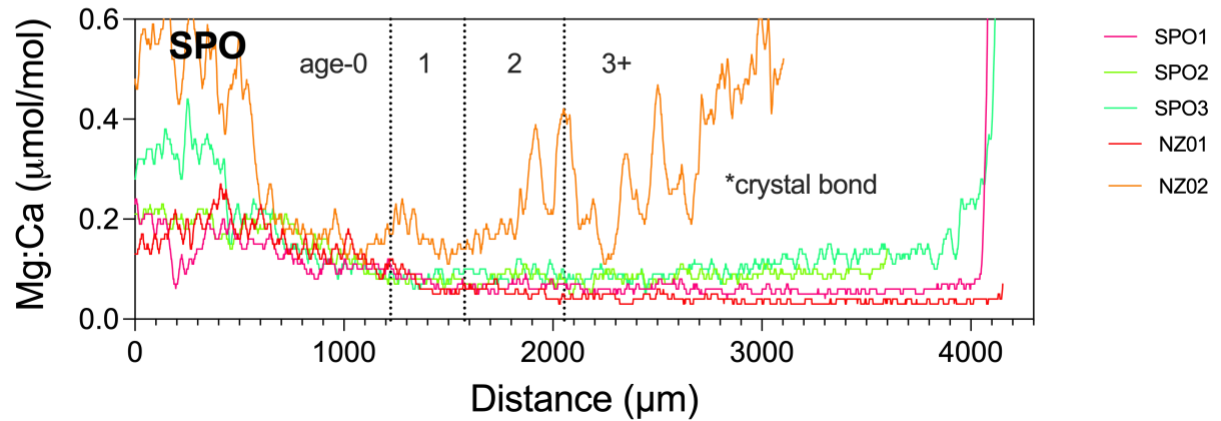

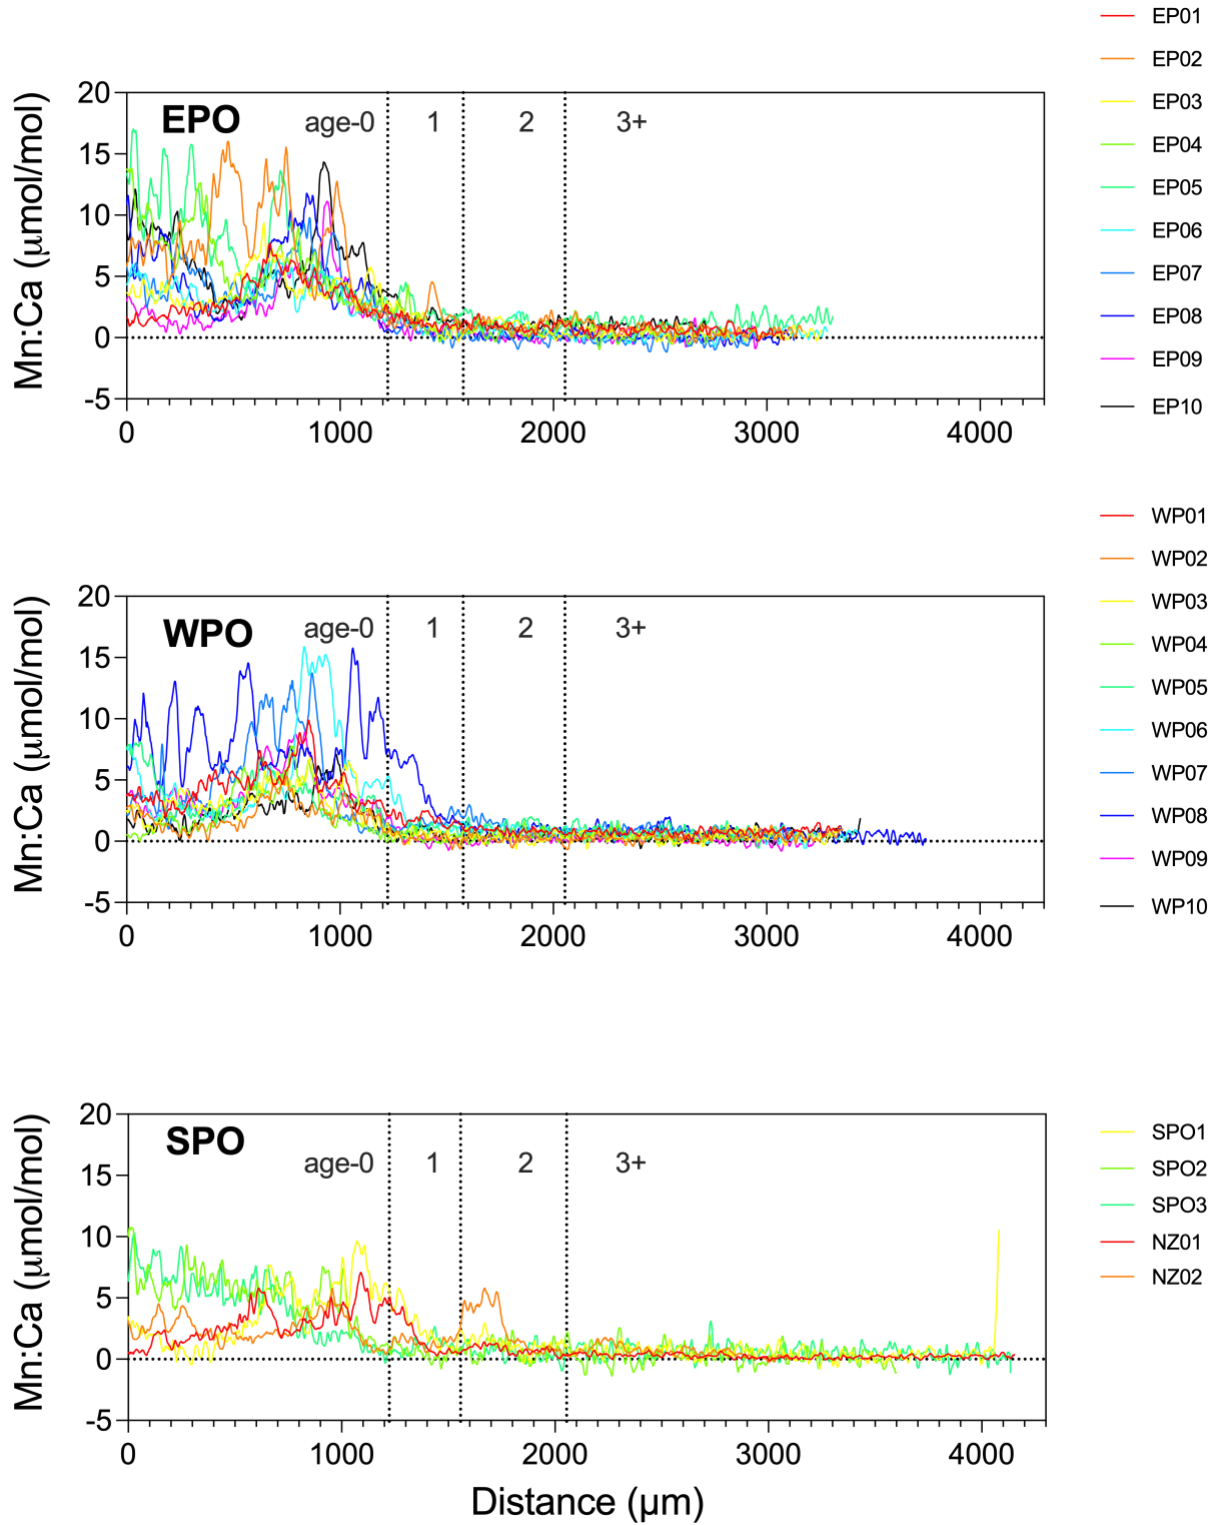

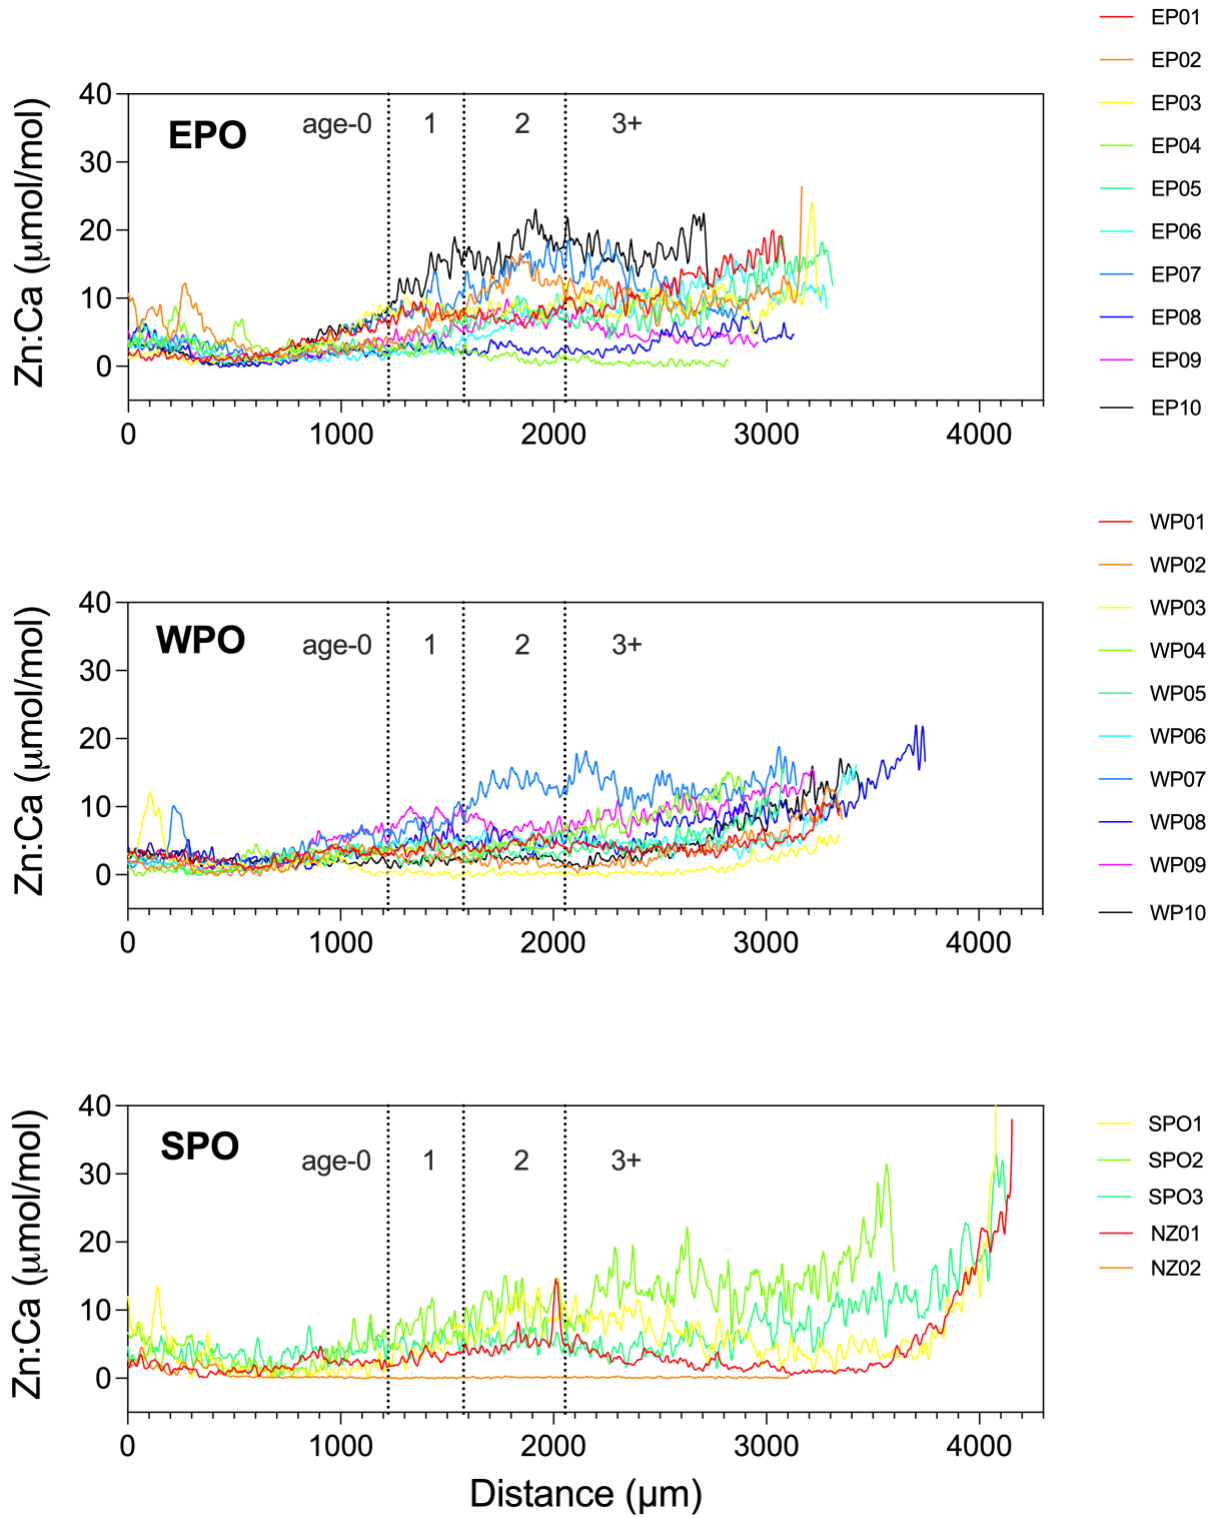

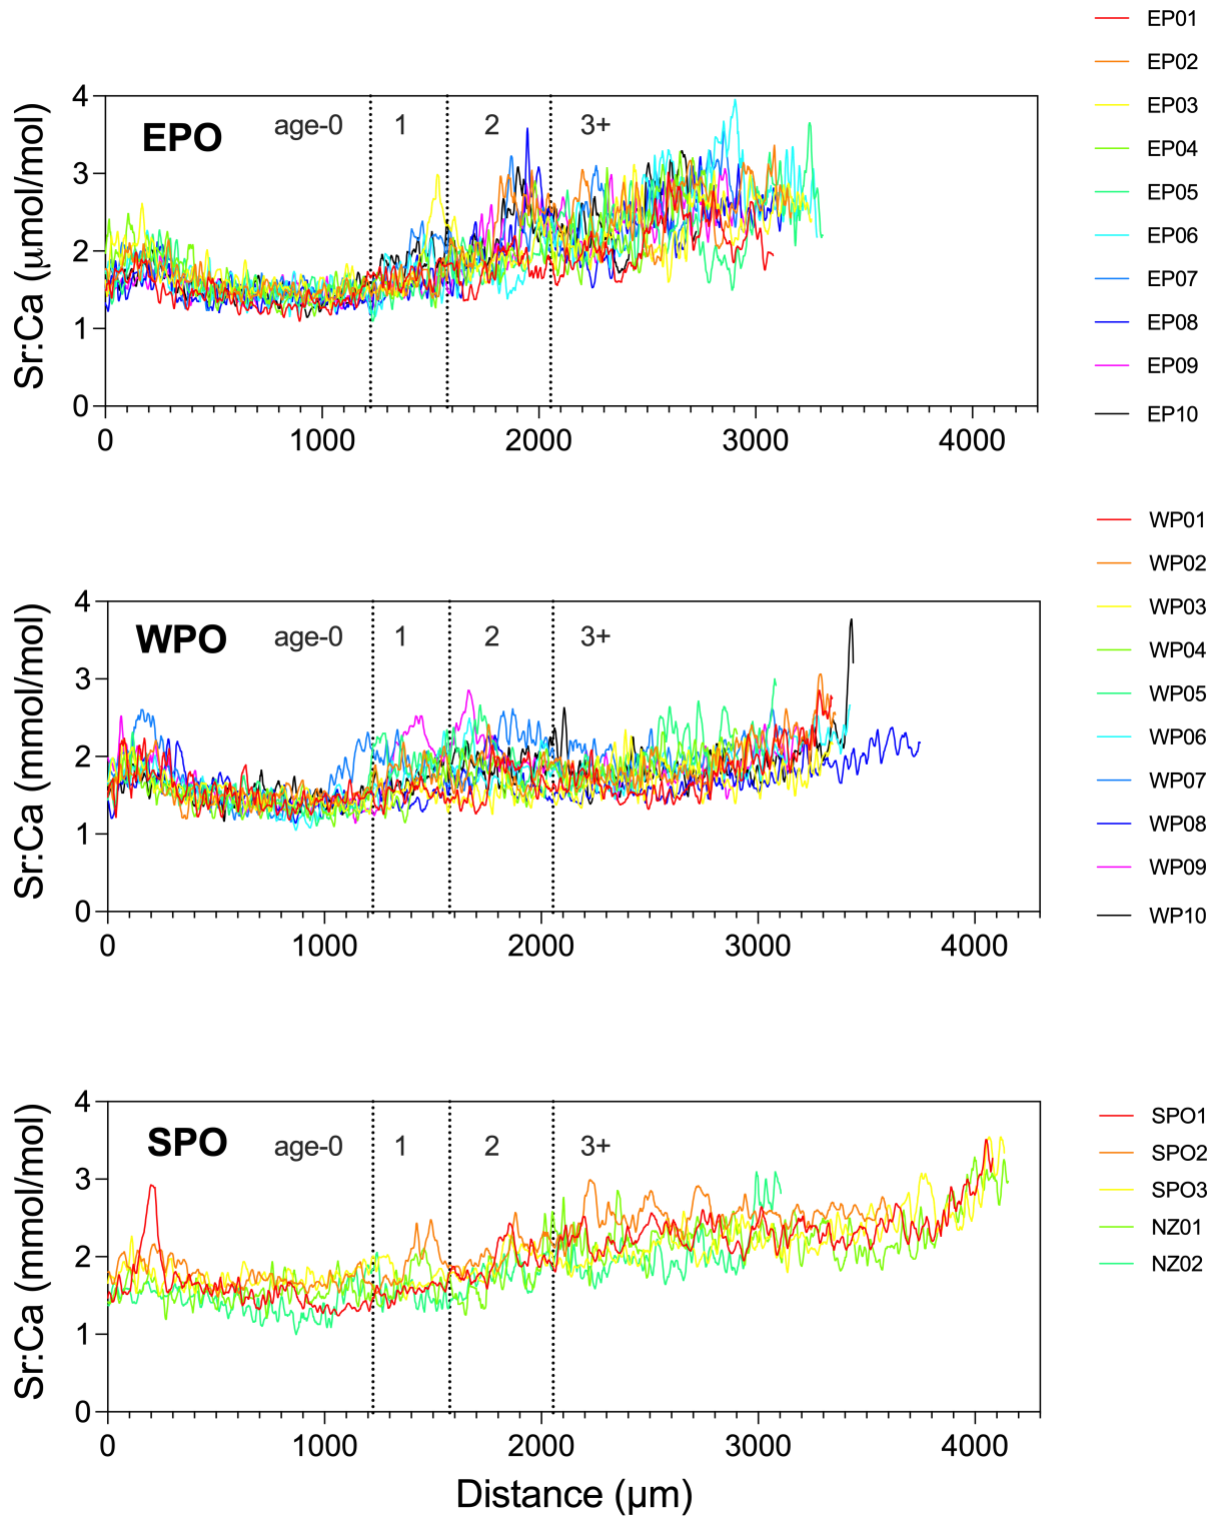

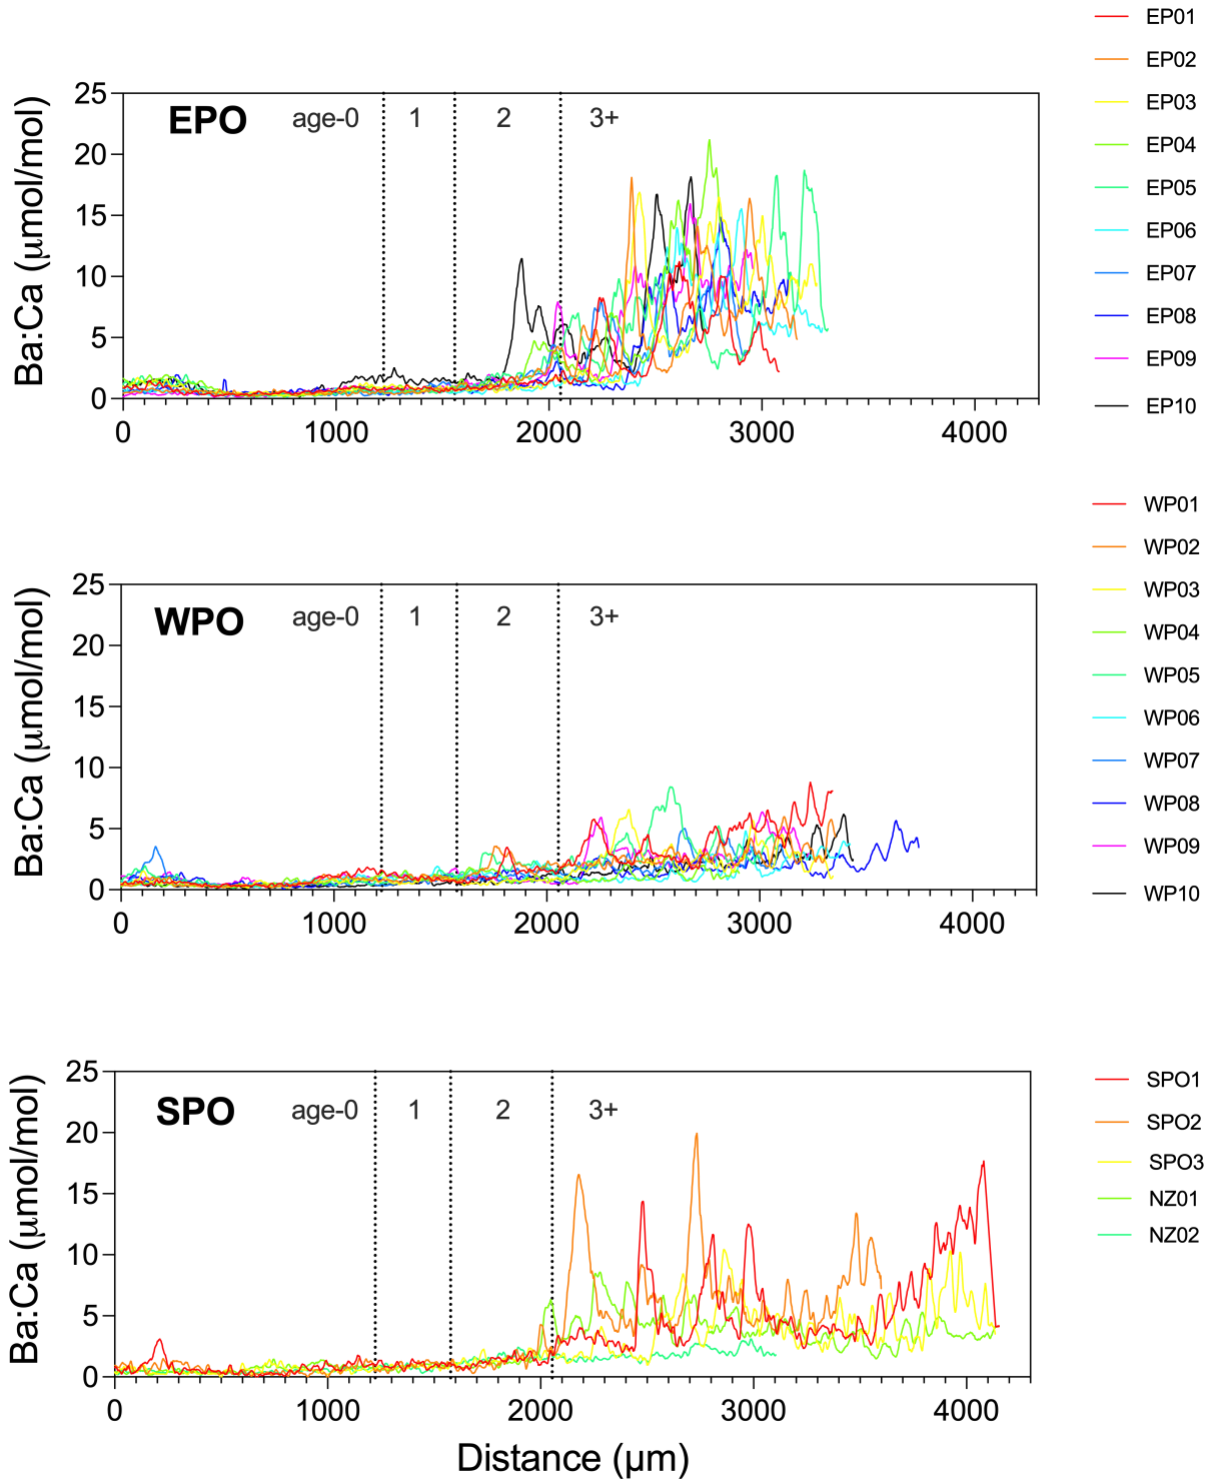

Supplement: pone.0275899.s002.pdf [file pone.0275899.s002.pdf]
